# Supplementary material for: Functional Benefit and Orthotic Effect of Dorsiflexion-FES in Children with Hemiplegic Cerebral Palsy
Source: MDPI journal article supplement (doi:10.3390/children10030531), 2023-03-09
Supplement: s1 [file s1]

**Supplementary Table S1.** Kinematic parameters of patients showing (OE+) and not showing OE (OE–) at first gait analysis

|                                                                | OE+ (N=11)                |                          | OE- (N=11)                |                           |
|----------------------------------------------------------------|---------------------------|--------------------------|---------------------------|---------------------------|
| FES                                                            | Off                       | On                       | Off                       | On                        |
| <b>Maximal dorsiflexion<br/>– mid swing<br/>(degrees)</b>      | 0.06°<br>(-8.74, 4.42)    | 3.85° *<br>(0.57,5.64)   | -7.39°<br>(-10.13, -3.7)  | -5.99°<br>(-9.27, -2.97)  |
| <b>Maximal dorsiflexion<br/>– terminal swing<br/>(degrees)</b> | -2.39°<br>(-6.86, 3.47)   | 4.55° *<br>(3.76, 6.54)  | -4.90°<br>(-7.96, -2.19)  | -4.38°<br>(-6.09, -1.17)  |
| <b>Minimal dorsiflexion<br/>–mid swing<br/>(degrees)</b>       | -11.21°<br>(-18.99, 1.07) | 0.15° *<br>(-10.91, 1.6) | -11.68°<br>(-14.68, -8.4) | -11.5°<br>(-13.67, -5.84) |
| <b>Minimal dorsiflexion<br/>– terminal swing<br/>(degrees)</b> | -9.8°<br>(-14.93, -3.9)   | 0.36° *<br>(-2.72, 2.10) | -12.1°<br>(-13.8, -9.34)  | -8.06°<br>(-11.6,-5.16)   |
| <b>Initial contact<br/>(degrees)</b>                           | -3.58°<br>(-7.63, -0.64)  | 2.01° *<br>(0.35, 3.08)  | -8.09°<br>(-9.64, -4.24)  | -5.73°<br>(-7.12, -3.86)  |

Data are presented as median degrees (interquartile range [IQR]); \*FES off vs on,  $p<0.01$ , \*\* FES off vs on,  $p<0.05$ .

OE=orthotic effect
