# Supplementary material for: Functional Benefit and Orthotic Effect of Dorsiflexion-FES in Children with Hemiplegic Cerebral Palsy
Source: MDPI journal article supplement (doi:10.3390/children10030531), 2023-03-09
Supplement: s1 [file s1]

**Supplementary Table S2.** Clinical and demographic parameters of patients showing (OE+) and not showing OE (OE–) at first gait analysis

|                                  | OE+( N=11)           | OE– (N=11)            |
|----------------------------------|----------------------|-----------------------|
| Age (y)                          | 8.30 (7, 10.5)       | 8.00 (7.5, 9.80)      |
| Male:Female                      | 8:3                  | 5:6                   |
| Birth (≥37w)                     | 6 (55%)              | 5 (45%)               |
| Etiology                         |                      |                       |
| Arterial infarct                 | 4 (36.5%)            | 3 (27.5%)             |
| Venous infarct                   | 4 (36.5%)            | 5 (45.5%)             |
| White matter injury              | 2 (18%)              | 1 (9%)                |
| Unknown                          | 1 (9%)               | 2 (18%)               |
| GMFCS I/II                       | 11:0                 | 10:1                  |
| Current AFO use                  | 5 (45.5%)            | 6 (54.5%)             |
| Botulinum toxin -LL              |                      |                       |
| -No                              | 8 (73%)              | 5 (45%)               |
| -Yes                             | 3 (27%)              | 6 (55%)               |
| Surgery to LL(n)                 |                      |                       |
| -No                              | 10 (91%)             | 9 (82%)               |
| -Yes                             | 1 (9%)               | 2 (18%)               |
| Device use Stimulation intensity | 3 (3, 4)             | 3.5 (2.75, 5)         |
| Hours/day                        | 5.51 (4.84, 7.06)    | 5.73 (5.17, 6.03)     |
| Stims/day                        | 3432 (2072, 3850)    | 3067 (2715, 3589)     |
| MAS                              |                      |                       |
| 1                                | 1 (9%)               | 4(36%)                |
| 1+                               | 2 (18%)              | 3(28%)                |
| 2                                | 8 (73%)              | 4(36%)                |
| Muscle strength                  |                      |                       |
| 2                                | 2 (18%)              | 3 (28%)               |
| 3                                | 2 (18%)              | 4 (36%)               |
| 4                                | 4 (36%)              | 3 (28%)               |
| 5                                | 3 (28%)              | 1 (9%)                |
| Muscle selectivity               |                      |                       |
| 0                                | 2 (18%)              | 1 (9%)                |
| 1                                | 4 (36%)              | 8 (72%)               |
| 2                                | 5 (45.5%)            | 2 (18%)               |
| Passive ankle ROM                |                      |                       |
| Knee flexion (deg)               | 10° (5.5, 15)        | 10° (5, 10)           |
| Knee extension (deg)             | 5° (2, 8.75)         | 2° (0, 7.25)          |
| Kinematic parameters#            |                      |                       |
| Heel strike                      | 2° (18%)             | 1° (9%)               |
| Max Swing DF (deg)               | -5.35° (-8.06,-4.31) | -4.8° (-7.8,-3.43)    |
| Initial contact (deg)            | -6.5° (-9.38,-4.56)  | -3.18° (-8.05,-1.15)  |
| Midstance Max                    | 20.37° (15.87, 2.05) | 11.75° (10.1, 16.66)* |
| Dorsiflexion (deg)               |                      |                       |

Data are presented as median (interquartile range [IQR]) or number (%). \* OE+ vs OE–, p<0.01.

(Mann-Whitney test). # kinematic parameters (degrees) of patients while DF-FES is turned off.

OE=orthotic effect; GMFCS=Gross Motor Function Classification System; AFO=ankle-foot orthosis;

Deg= degrees; DF=Dorsiflexion; LL=lower limb; MAS=Modified Ashworth Scale; ROM=range of

motion; Max=maximal
