# Supplementary material for: Functional Benefit and Orthotic Effect of Dorsiflexion-FES in Children with Hemiplegic Cerebral Palsy
Source: MDPI journal article supplement (doi:10.3390/children10030531), 2023-03-09
Supplement: s1 [file s1]

**Supplementary Table S3:** Biomechanical parameters at baseline and final assessments of study group.

| Patient | Ankle ROM<br>(knee flexed)<br>(degrees) |       | Ankle ROM<br>(knee extended)<br>(degrees) |       | MAS score |       | Muscle strength |       | Muscle selectivity |       |
|---------|-----------------------------------------|-------|-------------------------------------------|-------|-----------|-------|-----------------|-------|--------------------|-------|
|         | Baseline                                | Final | Baseline                                  | Final | Baseline  | Final | Baseline        | Final | Baseline           | Final |
| 1       | 5°                                      | 10°   | 5°                                        | 10°   | 1+        | 1+    | 3               | 4     | 0                  | 0     |
| 2       | 5°                                      | 5°    | 2°                                        | 5°    | 2         | 2     | 5               | 5     | 2                  | 2     |
| 3       | 15°                                     | 2°    | 5°                                        | 2°    | 1+        | 1+    | 2-              | 2-    | 1                  | 1     |
| 4       | 10°                                     | 15°   | 0°                                        | 5°    | 2         | 1+    | 2-              | 2     | 1                  | 1     |
| 5       | 25°                                     | 25°   | 20°                                       | 20°   | 1         | 1     | 3-              | 2     | 1                  | 1     |
| 6       | 15°                                     | 20°   | 8°                                        | 10°   | 1+        | 1+    | 3               | 2+    | 1                  | 1     |
| 7       | 10°                                     | 15°   | 2°                                        | 5°    | 2         | 1+    | 3+              | 3+    | 2                  | 2     |
| 8       | 15°                                     | 10°   | 5°                                        | 10°   | 2         | 2     | 4               | 4     | 2                  | 2     |
| 9       | 20°                                     | 20°   | 15°                                       | 20°   | 1         | 2     | 4-              | 4     | 1                  | 1     |
| 10      | 2°                                      | 20°   | 0°                                        | 10°   | 2         | 1+    | 4               | 4     | 2                  | 2     |
| 11      | 5°                                      | 10°   | 2°                                        | 4°    | 1+        | 1     | 5               | 5     | 2                  | 2     |
| 12      | 2°                                      | 5°    | 0°                                        | 0°    | 2         | 2     | 2-              | 2-    | 1                  | 1     |
| 13      | 7°                                      | 5°    | 5°                                        | 5°    | 2         | 2     | 2               | 2     | 2                  | 2     |
| 14      | 15°                                     | 15°   | 15°                                       | 15°   | 2         | 1     | 4               | 4     | 0                  | 1     |
| 15      | 10°                                     | 10°   | 10°                                       | 5°    | 2         | 1+    | 3               | 3     | 2                  | 2     |

ROM=range of motion; MAS=Modified Ashworth Scale.
